# Supplementary material for: The SMA Clinical Trial Readiness Program: creation and evaluation of a program to enhance SMA trial readiness in the United States
Source: PubMed Central journal article supplement (PMC7564894; doi:10.1186/s13023-020-01387-8), 2020-05-22
Supplement: 13023_2020_1387_MOESM5_ESM.pdf [file 13023_2020_1387_MOESM5_ESM.pdf]

| <b>Sample Site Readiness Checklist</b>                        |                                                                                                                                                |   |
|---------------------------------------------------------------|------------------------------------------------------------------------------------------------------------------------------------------------|---|
| <b>Minimum Criteria</b>                                       | Clinical research infrastructure                                                                                                               | ✓ |
|                                                               | Seeing SMA Patients for research or care                                                                                                       | ✓ |
| <b>Site Research Capabilities and Experience</b>              | Dedicated Clinical Research Unit                                                                                                               | ✓ |
|                                                               | Clinical trial experience (any)                                                                                                                | ✓ |
|                                                               | Neuromuscular clinical trial experience                                                                                                        | ✓ |
|                                                               | Conducting SMA research studies (not clinical trials)                                                                                          |   |
|                                                               | Active enrollment for SMA research studies (not clinical trials)                                                                               |   |
| <b>Patient Population</b>                                     | Children                                                                                                                                       | ✓ |
|                                                               | Adults                                                                                                                                         | ✓ |
| <b>Principal Investigator Experience</b>                      | SMA clinical trial experience                                                                                                                  | ✓ |
|                                                               | Neuromuscular clinical trial experience (not SMA)                                                                                              | ✓ |
|                                                               | Certified Principal Investigator                                                                                                               |   |
| <b>Clinical Research Coordinator Experience</b>               | SMA clinical trial experience                                                                                                                  | ✓ |
|                                                               | Neuromuscular clinical trial experience (not SMA)                                                                                              |   |
|                                                               | Coordinator(s) has completed ACRP CRC or SOCRA certification                                                                                   | ✓ |
| <b>Physical Therapist Experience</b>                          | SMA-specific motor function outcome measures (clinical evaluation)                                                                             | ✓ |
|                                                               | SMA-specific motor function outcome measures (clinical trials)                                                                                 |   |
|                                                               | Neuromuscular disease outcome measures (not SMA)                                                                                               | ✓ |
|                                                               | Completed reliability training for motor function outcome measures                                                                             | ✓ |
| <b>Staff Training Related to Conduct of Clinical Research</b> | Staff involved in clinical research have conducted all or majority of the listed training programs                                             | ✓ |
| <b>Clinical Trial Operations</b>                              | Centralized IRB                                                                                                                                |   |
|                                                               | Local IRB                                                                                                                                      | ✓ |
|                                                               | Well-documented informed consent process                                                                                                       | ✓ |
|                                                               | Established, well-documented approach for ensuring adherence to study protocol                                                                 | ✓ |
|                                                               | Established and well-documented approach to PI oversight                                                                                       | ✓ |
| <b>Site Readiness (Site Self-Assessment)</b>                  | Does not have existing gaps/concerns that would prevent the site from conducting new clinical trials in SMA immediately or in the near future. | ✓ |
